# Supplementary material for: Impact of HF radar current gap-filling methodologies on the Lagrangian assessment of coastal dynamics
Source: Copernicus journal article supplement (doi:10.5194/os-14-827-2018), 2018-08-24
Supplement: Supplementary file 1 [file os-14-827-2018-supplement.pdf]

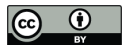

*Supplement of*

## **Impact of HF radar current gap-filling methodologies on the Lagrangian assessment of coastal dynamics**

**Ismael Hernández-Carrasco et al.**

*Correspondence to:* Ismael Hernández-Carrasco (ismaelhe@gmail.com)

The copyright of individual parts of the supplement might differ from the CC BY 4.0 License.

## S1. Catalog of HFR Gaps based on K-means analysis

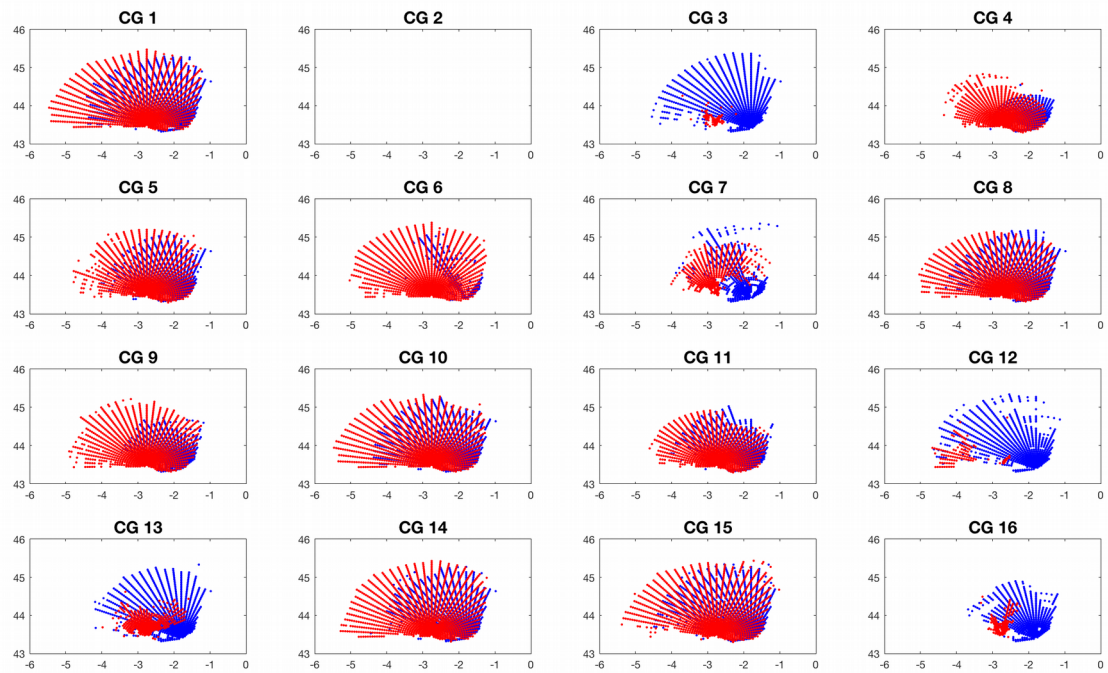

**Figure S1.** Complete prototypes of groups of gap distribution scenarios obtained by the KMA analysis applied to HFR availability-absence matrix for 2014.
